# Supplementary material for: Design and implementation of a large and complex trial in emergency medical services
Source: PubMed Central journal article supplement (PMC6368693; doi:10.1186/s13063-019-3203-0), 2019-02-08
Supplement: 13063_2019_3203_MOESM1_ESM.pdf [file 13063_2019_3203_MOESM1_ESM.pdf]

| Incident details |            |
|------------------|------------|
| Incident ID      | 1602010975 |
| Incident date    | [Redacted] |
| Incident time    | 17:09      |

| Identifying patients                         |                                         |
|----------------------------------------------|-----------------------------------------|
| Identified On: CAD                           | <input checked="" type="checkbox"/> Yes |
| Patient identified in ambulance service data | <input checked="" type="checkbox"/> Yes |
| Paramedic CRF received                       | <input checked="" type="checkbox"/> Yes |

| Resuscitation details                            |                                         |
|--------------------------------------------------|-----------------------------------------|
| Was resuscitation attempted?                     | <input checked="" type="checkbox"/> Yes |
| If resuscitation was not attempted, reason(s) :- |                                         |
| Massive cranial and cerebral destruction         | <input type="checkbox"/> No             |
| Hemicorporectomy                                 | <input type="checkbox"/> No             |
| Massive truncal injury incompatible with life    | <input type="checkbox"/> No             |
| Decomposition/ putrefaction                      | <input type="checkbox"/> No             |
| Incineration                                     | <input type="checkbox"/> No             |
| Hypostasis                                       | <input type="checkbox"/> No             |
| Rigor mortis                                     | <input type="checkbox"/> No             |
| Patient's wishes/ DNAR                           | <input type="checkbox"/> No             |
| Death expected due to terminal illness           | <input type="checkbox"/> No             |
| Efforts would be futile                          | <input type="checkbox"/> No             |
| Submersion >1 hour                               | <input type="checkbox"/> No             |
| Other                                            | <input type="checkbox"/> No             |
|                                                  | Details<br><input type="text"/>         |

| Paramedic details                                                                                                                             |                                         |
|-----------------------------------------------------------------------------------------------------------------------------------------------|-----------------------------------------|
| Was incident attended by an AIRWAYS-2 paramedic                                                                                               | <input checked="" type="checkbox"/> Yes |
| If YES, AIRWAYS-2 paramedic ID (of first A2 paramedic on scene)                                                                               | [Redacted]                              |
| If the paramedic who treated or enrolled the patient in the trial was not the first A2 paramedic on scene, please provide reasons and details | <input type="text"/>                    |

[Delete](#) [Save](#)

**Form B - COMPLETE FOR OHCA's WITH RESUSCITATION ATTEMPTED**

**B (1)**

| Patient Details                       |                                                    |
|---------------------------------------|----------------------------------------------------|
| Estimated age<br>or<br>Date of birth  | Gender <span style="float: right;">Female ▾</span> |
| <b>Initial cardiac arrest details</b> |                                                    |
| Presenting rhythm                     | VF ▾                                               |
| Was the arrest witnessed?             | Yes ▾                                              |
| If yes, who was it witnessed by?      | EMS ▾                                              |
| Was there bystander CPR?              | No ▾                                               |
| First crew details                    |                                                    |
| Date of first crew arrival            | Time of first crew arrival                         |
| 01/02/2016 📅                          | 17:26                                              |
| <span>Delete</span> <span>Save</span> |                                                    |

**Form C - COMPLETE FOR OHCA's WITH RESUSCITATION ATTEMPTED AND ATTENDED BY AIRWAYS-2 PARAMEDIC**

**C (1)**

| Patient eligibility                                                                                                                                                                                                                    |       |
|----------------------------------------------------------------------------------------------------------------------------------------------------------------------------------------------------------------------------------------|-------|
| Did the patient meet eligibility criteria?                                                                                                                                                                                             | Yes ▾ |
| If NO, why?                                                                                                                                                                                                                            |       |
| - Aged < 18 years                                                                                                                                                                                                                      | No ▾  |
| - Traumatic cardiac arrest                                                                                                                                                                                                             | No ▾  |
| - In-hospital cardiac arrest                                                                                                                                                                                                           | No ▾  |
| - Airways paramedic not 1st/2nd at patient's side                                                                                                                                                                                      | No ▾  |
| - Advanced airway management inserted by another HCPC registered paramedic, doctor or nurse already in place when AIRWAYS-2 paramedic arrives at patient's side (when the first paramedic to arrive is not participating in AIRWAYS-2) | No ▾  |
| - Resuscitation was not commenced or continued by ambulance staff or responder                                                                                                                                                         | No ▾  |
| - Patient detained by HMP                                                                                                                                                                                                              | No ▾  |
| - Previously recruited to trial                                                                                                                                                                                                        | No ▾  |
| - Patient previously expressed wishes not to participate                                                                                                                                                                               | No ▾  |
| - Mouth opening < 2cm                                                                                                                                                                                                                  | No ▾  |
| - Patient did not have an OHCA                                                                                                                                                                                                         | No ▾  |
| ENROLMENT DETAILS                                                                                                                                                                                                                      |       |
| If patient was eligible (or believed to be eligible at the time of airway management), were they consciously enrolled in AIRWAYS-2?                                                                                                    | Yes ▾ |
| If NO, reason                                                                                                                                                                                                                          | ▾     |
| If NO, reason, other                                                                                                                                                                                                                   |       |
| <span>Delete</span> <span>Save</span>                                                                                                                                                                                                  |       |

**Form D - COMPLETE FOR AIRWAYS-2 PATIENTS**

**D (1)**

| ED ADMISSION DETAILS                  |                              |
|---------------------------------------|------------------------------|
| Patient Name                          | ██████████ (?)               |
| Was patient admitted to ED?           | Yes ▾                        |
| if YES:                               |                              |
| Which hospital?                       | SW17 - Southampton General ▾ |
| - If Other hospital, please specify   |                              |
| Date of arrival                       | 01/02/2016 📅                 |
| Approx time of arrival                | 19:02                        |
| <span>Delete</span> <span>Save</span> |                              |

**Patient details**

Please check the patient details and update as required

Name

Gender

Which hospital?

If other, details

Date admitted

Time admitted

Approximate age (for identification purposes)

---

**ICU (OR EQUIVALENT LEVEL OF CARE) DETAILS**

NHS Number

Date of birth

Did patient survive to ICU admission?

If No, date/time of death

If Yes, date/time of arrival in ICU

Did patient survive to ICU discharge?

If No, date/time of death

If Yes, date/time of ICU discharge

---

**Hospital transfer details**

Was patient transferred to another hospital prior to approach?

If YES, Which hospital?

- If Other hospital, please specify

---

Have there been any additional ward movements (post ICU discharge) prior to transfer?

**If yes, please complete below**

| Admission / transfer date     | Admission / transfer time     | Level of care for this admission | Destination code<br>(i.e. level of care the patient will move to on leaving this admission) |
|-------------------------------|-------------------------------|----------------------------------|---------------------------------------------------------------------------------------------|
| <input type="text" value=""/> | <input type="text" value=""/> | <input type="text" value=""/>    | <input type="text" value=""/>                                                               |

---

Date of hospital transfer

Time of hospital transfer

---

**PATIENT CAPACITY (only required if patient survived to ICU discharge)**

Does patient have capacity to consent?

[Delete](#) [Save](#)

PATIENT SCREENING

H1 (1)

| PATIENT APPROACH: COMPLETE FOR ALL PATIENTS                                                            |                                                                                                                                                          |
|--------------------------------------------------------------------------------------------------------|----------------------------------------------------------------------------------------------------------------------------------------------------------|
| Was the patient approached in hospital?                                                                | <input type="text" value="Yes"/>                                                                                                                         |
| If NO, please provide reason                                                                           | <i>Research team not notified of patient until 5 months after dis</i>                                                                                    |
| If YES, date of approach                                                                               | 30/08/2016                                                                                                                                               |
| If the patient was approached in hospital were they given a PIL?                                       | <input type="text" value="Yes"/>                                                                                                                         |
| If NO, please provide reason                                                                           |                                                                                                                                                          |
| If the patient was not approached in hospital, was study information (including PIL) sent in the post? | <input type="text" value="-"/>                                                                                                                           |
| If NO, please provide reason                                                                           |                                                                                                                                                          |
| If YES:                                                                                                |                                                                                                                                                          |
| Date information sent                                                                                  |                                                                                                                                                          |
| Did the patient respond?                                                                               | <input type="text" value="-"/>                                                                                                                           |
| PATIENT CONSENT: COMPLETE IF PIL GIVEN / PIL SENT AND PATIENT RESPONDED                                |                                                                                                                                                          |
| Which consent option did the patient select?                                                           | <input type="text" value="A (Active follow up)"/>                                                                                                        |
| Date of consent                                                                                        | 30/08/2016                                                                                                                                               |
| Please upload consent form to the database                                                             | SW03481_Airways pt consent form [redacted].pdf <input type="checkbox"/> Delete<br><input type="text" value=""/> <input type="button" value="Browse..."/> |
| Upload Status:                                                                                         | <input type="text"/>                                                                                                                                     |
| Name of person completing form:                                                                        | <i>Clare Bolger</i>                                                                                                                                      |
| Signature of person completing form completed?:                                                        | <input type="text" value="Yes"/>                                                                                                                         |
| Date completed                                                                                         | 30/08/2016                                                                                                                                               |

**COMPLETE THIS FORM FOR PATIENTS WHO HAVE CONSENTED UNDER OPTIONS A OR B**

|                                                                                                                                 |  |                                                                                                                            |  |
|---------------------------------------------------------------------------------------------------------------------------------|--|----------------------------------------------------------------------------------------------------------------------------|--|
| Patient address<br>Line 1 [Redacted]<br>Line 2 [Redacted]<br>Town / City [Redacted]<br>County [Redacted]<br>Postcode [Redacted] |  | GP address<br>Line 1 [Redacted]<br>Line 2 [Redacted]<br>Town / City [Redacted]<br>County [Redacted]<br>Postcode [Redacted] |  |
| Patient phone number [Redacted]                                                                                                 |  | CP name [Redacted]                                                                                                         |  |
| Can answer machine messages be left? <input type="button" value="Yes"/>                                                         |  | CP phone number [Redacted]                                                                                                 |  |
| Patient email address [Redacted]                                                                                                |  | Has CP letter been downloaded and filed in patient notes? <input type="button" value="Yes"/>                               |  |

Patient's preferred mode of contact for follow up questionnaires (tick all that apply)

Post

Phone

Email/web

**WARD MOVEMENTS**

| Admission / transfer date          | Admission / transfer time | Level of care for this admission | Destination code (i.e. level of care the patient will move to on leaving this admission) |   |
|------------------------------------|---------------------------|----------------------------------|------------------------------------------------------------------------------------------|---|
| 01/02/2016                         | 19:47                     | Level 3 (e.g. ITU)               | 2 (Level 2)                                                                              | 1 |
| 01/02/2016                         | 21:30                     | Level 2 (e.g. HDU)               | 1 (Level 1)                                                                              | 2 |
| 03/02/2016                         | 15:53                     | Level 1 (e.g. General)           | 4 (Hospital discharge)                                                                   | 3 |
| + <input type="button" value="1"/> |                           |                                  |                                                                                          |   |

\* Note:- date/time of first admission should match ICU discharge date/time on Form G/G2

**DISCHARGE DETAILS**

Did patient survive to hospital discharge?

If NO, date/time of death [Redacted]

If Yes:  
 Date/time of discharge: 09/02/2016 18:00  
 Discharge destination: Home

If other hospital, please select hospital name: [Redacted]

If other, details: [Redacted]

Name of person completing form: Karen Salmon/ katie sweet

Signature of person completing form completed?:

Date completed: 02/09/2016

[Delete](#) [Save](#)
